# Supplementary material for: Role of exercise and rapamycin on the expression of energy metabolism genes in liver tissues of rats fed a high-fat diet
Source: PubMed Central journal article supplement — Mol Med Rep. 2020 Jul 28;22(4):2932–40. doi: 10.3892/mmr.2020.11362 (PMC7453655; doi:10.3892/mmr.2020.11362), 2020-07-28
Supplement: Supplementary_Data.pdf [file Supplementary_Data.pdf]

Table SI. Sequences of the primers used for reverse transcription-quantitative PCR.

| Gene           | Forward (5'→3')          | Reverse (5'→3')         |
|----------------|--------------------------|-------------------------|
| PGC-1 $\alpha$ | CAGTGCTACCTGAGAGAGACT    | TTGACTGGGATGACCGAAGTGC  |
| PGC-1 $\beta$  | GACACAGATGAAGATCCAAGC    | CTCCTCAAAGCTCTTCTTGCC   |
| PPAR $\alpha$  | CCTTACCTGTGAACACGATCTG   | CAGGTAGGCTTCGTGGATTCTC  |
| PPAR $\beta$   | CCTACAACGAGATCAGCGTGCATG | CCTGGTCGTTGAGGAAGAGGCTG |
| ChREBP         | CGAGGTGGTGATGCGTGAAT     | GAAGTTTGAAGATGTGGCGT    |
| SREBP-1c       | TCCTGCACCACCAACTGCTTAG   | AGTGGCAGTGATGGCATGGACT  |
| CPT1 $\alpha$  | ATATCAAGGACAGCAGGCACA    | CTCAGCAGCCTCCCATGCT     |
| ACC $\alpha$   | CACATCATGAAGGAGGAGG      | GCTATCACACAGCCTGGGTC    |
| PDK4           | CTGCTCCAACGCCTGTGATGG    | GACATGGAATAGAGATTCAGATC |
| GAPDH          | GGCACAGTCAAGGCTGAGAATG   | ATGGTGGTGAAGACGCCAGTA   |

PGC, peroxisome proliferator-activated receptor  $\gamma$  coactivator; PPAR, peroxisome proliferator-activated receptor; SREBP, sterol regulatory element binding protein; ChREBP, carbohydrate-response element-binding protein; CPT1 $\alpha$ , carnitine palmitoyl transferase1 $\alpha$ ; ACC $\alpha$ , acyl-CoA carboxylase 1; PDK4, pyruvate dehydrogenase kinase 4.

Table SII. Effects of exercise and rapamycin on blood biochemical parameters in rats fed high-fat diets.

| Parameter                | N (n=6)      | H (n=6)      | HE (n=4)    | HR (n=5)     | HER (n=4)    |
|--------------------------|--------------|--------------|-------------|--------------|--------------|
| FBG, g/l                 | 1.18±0.18    | 1.49±0.10    | 1.24±0.20   | 1.39±0.32    | 1.65±0.31    |
| FTG, g/l                 | 0.82±0.41    | 1.28±0.38    | 1.34±0.15   | 1.16±0.41    | 1.23±0.22    |
| FFA, $\mu$ g/ml          | 1.63±0.59    | 1.80±0.15    | 2.21±0.26   | 2.50±0.50    | 2.04±0.42    |
| $\beta$ -HB, $\mu$ mol/l | 300.01±18.53 | 277.32±56.51 | 290.32±6.88 | 296.62±46.41 | 283.52±28.70 |
| FINS, mU/l               | 21.62±1.91   | 21.38±3.83   | 20.58±2.43  | 25.39±5.01   | 20.43±4.17   |

Data are presented as the mean  $\pm$  SE. N, normal; H, rats fed high-fat diet; E, exercise; R, rapamycin; FBG, fasting blood glucose; FTG, fasting plasma triglyceride; FFA, fasting plasma non-esterified fatty acids;  $\beta$ -HB,  $\beta$ -hydroxybutyrate; FINS, fasting plasma insulin.
